# Supplementary material for: Soluble PD-L1 as a Biomarker in Malignant Melanoma Treated with Checkpoint Blockade
Source: Oxford University Press journal article supplement (doi:10.1158/2326-6066.cir-16-0329), 2017-05-18
Supplement: 23266066cir160329-sup-174695_2_supp_4044564_zq3nzz.doc [file 23266066cir160329-sup-174695_2_supp_4044564_zq3nzz.doc]

**SUPPLEMENTAL FIGURE LEGEND AND FIGURES**

**Supplemental Figure 1.** Schematic diagram of specific primers for the detection of PD-L1 variants. The primers were designed to contain two splicing ends, and they were specific for PD-L1-1, 3/12, and 9 variants.

**Supplemental Figure 2.** A and B. Generation of recombinant fusion proteins of PD-L1 variants. The recombinant fusion proteins of PD-L1 variants were analyzed by SDS-PAGE, Coomassie blue staining (A) and Immunoblotting assay (B). C. Splicing varients of PD-L1 in melanoma cell lines. Variants of PD-L1-1, 3, 9, and 12 were examined by RT-PCR with the variant specific primers. D. Over-expression of PD-L1-1 variant on cell surface of A375 cells. Spliced variants of PD-L1-1, PD-L1-3 and PD-L1-9 were separetely over-expressed in A375 cells by lentiviral transduction. Expression of PD-L1 variants on cell surface of A375 cells were analyzed by flow cytometry. A375 cells expressing PD-L1-3 or PD-L1-9 variants were used as controls.

**Supplemental Figure 3.** Inhibitory effects of membrane-bound PD-L1 on proliferation of antigen specific CD8+ T cells.A and B. Expression of PD-L1 on melanoma cells. PD-L1 was transduced into A375 and K028 melanoma cells with a PD-L1 expressing vector. Expression of PD-L1 on cell surface of A375 and K028 was examined by flow cytometry. C. Effects of PD-L1 on antigen specific CD8+ T cell activation and proliferation. PD-L1 expressing A375 and K028 cells were irradiated and co-cultured with antigen JS90 specific CD8+ T cells in presence of 1µg/ml JS90 peptide. Proliferation of the T cells were examined by [3H]thymidine incorperation assay. Both A375 and K028 cells were HLA A*0201 positive by HLA genotyping. A375 parental or K028 parental: A375 or K028 parental cell line. A375/Mock or K028/Mock: A375 or K028 cells were tranduced with an irrelevent gene expressing vector. A375/PD-L1 or K028/PD-L1: A375 or K028 cells were tranduced with membrane-bound PD-L1 expressing vector. JS90 is a 10-mer HLA A*0201 peptide from ML-IAP. L11 is a 9-mer negative control HLA A*0201 peptide of HIV.

**Supplemental Figure 4.** Effects of cytokines on expression of PD-L1 and cell proliferation in melanoma cell lines. Melanoma cell lines were treated with either 2000 U/ml IFNα, or 200 U/ml IFN, or 10 ng/ml TNFα for 2 days. Expression of PD-L1 on the cell surface were analyzed by flow cytometry, and the cell numbers were counted after the treatment. A. Cytokine treated A375. B. Cytokine treated K028. C. Cytokine treated UACC257. D. Cytokine treated K008.

**Supplemental Figure 5.** Associations between sPD-L1 secretion and PD-L1 expression in presence or absence of cytokine. A to F. IFN-γ-inducedsPD-L1 secretion and PD-L1 expression in melanoma cell lines in dose dependent manner. Melanoma cell lines were cultured in the presence of different concentrations of either IFN-γ or TNFα for two days. The culture medium were analyzed for sPD-L1 secretion by immunoprecipitation, SDS-PAGE, and immunoblotting. Loading samples were normalized by cell numbers. Expression of PD-L1 on the cell surface were analyzed for by flow cytometry. A and B. IFN treated A375. C and D. IFN treated K028. E and F. TNFα treated K028. G. Association between secretion of sPD-L1 and expression of membrane-bound PD-L1 in melanoma cell lines in absence of cytokine. Melanoma cell lines were cultured for two days in absence of cytokine. sPD-L1 in the culture medium were analyzed by immunoprecipitation, SDS-PAGE, and immunoblotting. Loading samples were normalized by cell numbers. PD-L1 expression on the cell surface were analyzed by flow cytometery as shown in untreated cells of Supplemental Figure 3.

**Supplemental Figure 6.** Secretion of sPD-L1 and expression of membrane-bound PD-L1 in response to sodium azide. Melanoma cell lines were treated with sodium azide (NaN3) for 2 days. sPD-L1 secretion were examined by immunoprecipitation, SDS-PAGE and immunoblotting. Loading samples were normalized by cell numbers. Membrane-bound PD-L1 expression and cell apoptosis were analyzed by flow cytometry. A. NaN3 treated A375. B. NaN3 treated K028. C. NaN3 treated UACC257.

**Supplemental Figure 7.** Specific anddifferent recognitions of sPD-L1 variants by anti-PD-L1 antibody clone 29E.12B1 and 130021. A and B. Specificity oftwo capture anti-PD-L1 antibodies for PD-L1 by ELISA. The detection specificity for PD-L1 were shown with either 29E.12B1 or 130021 antibody. C. Detections of sPD-L1 variants by ELISA with 130021 capture antibody. D. Detections of sPD-L1 variants by ELISA with 29E.12B1 capture antibody.

**Supplemental Figure 8.** A. Schema on recognition regions of anti-PD-L1 antibodies. B. Detection of PD-L1-HIS (Amino acid 19-239) and PD-L1-3/Ig (Amino acid 19-178) by SDS-PAGE and immunoblotting assay with 130021 antibody. PD-L1-HIS represents long variants, whereas PD-L1-3 is the shortest variant. C. Detection of PD-L1-HIS (Amino acid 19-239) and PD-L1-3/Ig (Amino acid 19-178) by SDS-PAGE and immunoblotting assay with an anti-PD-L1 antibody (clone 29E.1D5). The blot in E was stripped and reblotted with 29E.1D5 antibody. D. Detection of PD-L1-3/Ig (Amino acid 19-178) by SDS-PAGE and immunoblotting assay with either 29E.12B1 or 29E.1D5 antibody. E. Domain specificity of anti-PD-L1 monoclonal antibodies. 300.19 cells were stably transfected with a cDNA construct encoding full-length human PD-L1 (signal, IgV, IgC, transmembrane and cytoplasmic domains), or a construct encoding the human PD-L1 signal and IgV domains fused to the mucin, transmembrane, and cytoplasmic domains of human TIM-3. 300-PD-L1, 300-PD-L1 IgV, or untransfected cells were stained with 10 µg/ml of the indicated antibody followed by 10 µg/ml goat anti-mouse IgG-PE and analyzed by flow cytometry. Data shown are mean fluorescence intensity. This data shows that both 2A3 and 12B1 mabs recognize the IgV domain of PD-L1. F. 29E.12B1 recognizes a non-overlapping epitope than 29E.2A3. 300-PD-L1 cells were pre-incubated with the indicated concentrations of unlabeled 29E.12B1, 29E.2A3, or mouse IgG1 isotype control and then 1 µg/ml phycoerythrin (PE)-conjugated 29E.2A3, washed, and analyzed by flow cytometry. The data shows 2A3 will block its own binding but that 12B1 does not block 2A3 binding.

**Supplemental Figure 9**. A and B. Impact of serum or plasma matrices in quantitative detection of sPD-L1. sPD-L1 in sera and plasma from same patients were examined by ELISA with either 130021 or 29E.12B1 antibodies. The results represent Mean + SE of two independent experiments.

**Supplemental Figure 10.** Kinetic changes of sPD-L1all and sPD-L1L in plasma of melanoma patients receiving ipilimumab plus bevacizumab. A to F. Based on pretreatment levels of sPD-L1all or PD-L1L, the patients are divided into three groups, respectively. Black line indicates < 1.5-fold increases in sPD-L1. Red line indicates ≥ 1.5-fold increases in sPD-L1 after 5 months of treatment. Blue line indicates ≥ 1.5-fold increases in sPD-L1 within 4.5 months post-treatment, and there were no any samples available after 4.5 months of treatment. m represents survival months. Patients, who are still alive or deceased are marked with or without asterik, respectively. A dash line in A indicate 1.4 ng/ml. A dash lines in B indicate 0.5 ng/ml. Dash lines in C indicate 0.5 and 1.4 ng/ml, respectively. Dash lines in D indicate 0.1 and 0.5 ng/ml, respectively. A dash line in E indicates 0.5 ng/ml. A dash line in F indicates 0.1 ng/ml. G and H. Associations between long term or delayed increases in sPD-L1 after the treatment and clinical responses. α indicates that samples are available from 5 to 7 months post-treatment. Fisher exact tests were performed based on window from 5 to 7 months post-treatment. P < 0.05 are considered statistically significant.

**Supplemental Figure 11.** Kinetic changes of cytokinesin plasma of melanoma patients receiving ipilimumab plus bevacizumab. Based on kinetic changes of sPD-L1, patients were divided into four groups. A. Patients with long term or delayed increases in sPD-L1. B. Patients with short term increases in sPD-L1. C. Patients without any increases in sPD-L1 but with either long term or short term increases in cytokines. D. Patients without any increases in both sPD-L1 and cytokines. Black line indicates < 2-fold increases in cytokines. Red line indicates ≥ 2-fold increases in cytokines after 5 months of treatment. Blue line indicates ≥ 2-fold increases in cytokines within 4.5 months post-treatment, and there were no any samples available after 4.5 months of treatment.

**Supplemental Figure 12.** sPD-L1 in plasma of melanoma patients receiving ipilimumab. A and B. Associations between pretreatment levels of sPD-L1 and clinical responses. C to H. Based on pretreatment levels of sPD-L1all or PD-LL, the patients are divided into three groups, respectively. Black line indicates < 1.5-fold increases in sPD-L1. Blue line indicates ≥ 1.5-fold increases in sPD-L1 within 4.5 months post-treatment, and there were no any samples available after 4.5 months of treatment. Pink line represents changes of sPD-L1all and sPD-L1L in patient P169, who showed distinct characters in sPD-L1 secretions (shown in I). I. Different charectors in secretions of sPD-L1 in P169 after ipilimumab treatment. Pink lines represent changes of sPD-L1L and sPD-L1all. Red line represents that the increases in the shortest sPD-L1 variant were greater than 1.5-folds. m represents survival months. Patients, who are still alive or deceased are marked with or without asterik, respectively. A dash line in C indicate 1.4 ng/ml. A dash lines in D indicate 0.5 ng/ml. Dash lines in E indicate 0.5 and 1.4 ng/ml, respectively. Dash lines in F indicate 0.1 and 0.5 ng/ml, respectively. A dash line in G indicates 0.5 ng/ml. Dash lines in H indicates 0.1 ng/ml.

**Supplemental Figure 13.** Kinetic changes of sPD-L1all and sPD-L1L in sera of melanoma patients receiving ipilimumab in ECOG 1608 trial. A to F. Based on pretreatment levels of sPD-L1all or PD-L1L, the patients are divided into three groups, respectively. Black line indicates < 1.5-fold increases in sPD-L1. Red line indicates ≥ 1.5-fold increases in sPD-L1 after 5 months of treatment. Blue line indicates ≥ 1.5-fold increases in sPD-L1 within 4.5 months post-treatment, and there were no any samples available after 4.5 months of treatment. Pink line represents changes of sPD-L1all and sPD-L1L of EP45, who showed distinct characters in sPD-L1 secretions (shown in Figure 6E). Patients, who are still alive or deceased are marked with or without asterik, respectively. A dash lines in A indicate 1.4 ng/ml. A dash line in B indicate 0.5 ng/ml. Dash lines in C indicate 0.5 and 1.4 ng/ml, respectively. Dash lines in D indicate 0.1 and 0.5 ng/ml, respectively. Dash lines in E indicates 0 and 0.5 ng/ml, respectively. A dash line in F indicates 0.1 ng/ml. G and H. Associations between long term or delayed increases in sPD-L1 after the treatment and clinical responses. α indicates that samples are available from 5 to 11 months post-treatment. Fisher exact tests were performed based on window from 5 to 11 months post-treatment. P < 0.05 are considered statistically significant.

**Supplemental Figure 14.** Kinetic changes of sPD-L1all and sPD-L1L in plasma of melanoma patients receiving anti-PD-1 antibody. A to F. Based on pretreatment levels of sPD-L1all or PD-LL, the patients are divided into three groups, respectively. Black line indicates < 1.5-fold increases in sPD-L1. Red line indicates ≥ 1.5-fold increases in sPD-L1 after 5 months of treatment. Blue line indicates ≥ 1.5-fold increases in sPD-L1 within 4.5 months post-treatment, and there were no any samples available after 4.5 month treatment. m represents survival months. Patients, who are still alive or deceased are marked with or without asterik, respectively. A dash lines in A indicate 1.4 ng/ml. A dash line in B indicate 0.5 ng/ml. Dash lines in C indicate 0.5 and 1.4 ng/ml, respectively. A dash line in D indicate 0.1 ng/ml. Dash lines in E indicates 0 and 0.5 ng/ml, respectively. Dash lines in F indicates 0 and 0.1 ng/ml, respectively. G and H. Associations between increases in sPD-L1 after the treatment and clinical responses. α indicates that samples in 5 to 11 months post-treatment are available. Fisher exact tests were performed based on 5 to 11 month window. P < 0.05 are considered statistically significant.

**Supplemental Figure 15.** Kinetic changes of cytokinesin plasma of melanoma patients receiving anti-PD-1 antibody. Based on kinetic changes of sPD-L1, patients were divided into two groups. A. Patients with either short term or long term/delayed increases in sPD-L1. B. Patients without any increases in sPD-L1. Black line indicates < 2-fold increases in cytokines. Red line indicates ≥ 2-fold increases in cytokines after 5 months of treatment. Blue line indicates ≥ 2-fold increases in cytokines within 4.5 months post-treatment, and there were no any samples available after 4.5 month treatment.

**Supplemental Figure 16.** Associations of pretreatment levels of sPD-L1 with survival after check-point blockade. Survival from patients with high pretreatment levels of sPD-L1 were compared to the survival from patients with lower pretreatment levels of sPD-L1.

**Supplemental Figure 17.** Associations of long term or delayed increases in sPD-L1 with survival after check-point blockade.Survival from patients with long term or delayed increases in sPD-L1 were compared to the survival from patients without increases in sPD-L1.

**Supplemental Figure 18.** Effects of cytokines on secretions of PD-L1 variants in DC. Human adherent monocytes were treated with 50 ng/ml GM-CSF and 10 ng/ml IL-4 for 5 days, and the cells were further stimulated with either 2000 U/ml IFNα, or 200 U/ml IFN, or 10 ng/ml TNFα, or 2 µg/ml LPS for additional 2 days. sPD-L1 in culture supernatants was analyzed by ELISA.

**Supplemental Table 1**. A. Amino acid regions of sPD-L1 variants. B. Amino acid regions of recombinant PD-L1 proteins.

**Supplemental Table 2.** Associations of pretreatment levels of sPD-L1 with variables.
